# Supplementary material for: Feasible Analytical Protocol of Residual polymers in Culture Medium after Biodegradation Testing
Source: Research Square preprint supplement (doi:10.21203/rs.3.rs-6191631/v1), 2025-03-18
Supplement: Supplementary file 1 [file 5bdb4a8bf9dd333b1f298d32.pdf]

Supporting information for

# Feasible Analytical Protocol of Residual polymers in Culture Medium after Biodegradation Testing

Yuta Sawanaka<sup>1</sup>, Junko Torii,<sup>1</sup> Yuya Tachibana,<sup>1, 2\*</sup> and Ken-ichi Kasuya<sup>1, 2\*</sup>

<sup>1</sup> Division of Molecular Science, Faculty of Science and Technology, Gunma University, 1-5-1 Tenjin, Kiryu, Gunma, 376-8515, Japan

<sup>2</sup> Gunma University Center for Food Science and Wellness, 4-2 Aramaki, Maebashi, Gunma, 371-8510, Japan

Correspondence and requests for materials should be addressed to Y.T.: [tachibana@gunma-u.ac.jp](mailto:tachibana@gunma-u.ac.jp) and K. K.: [kkasuya@gunma-u.ac.jp](mailto:kkasuya@gunma-u.ac.jp)

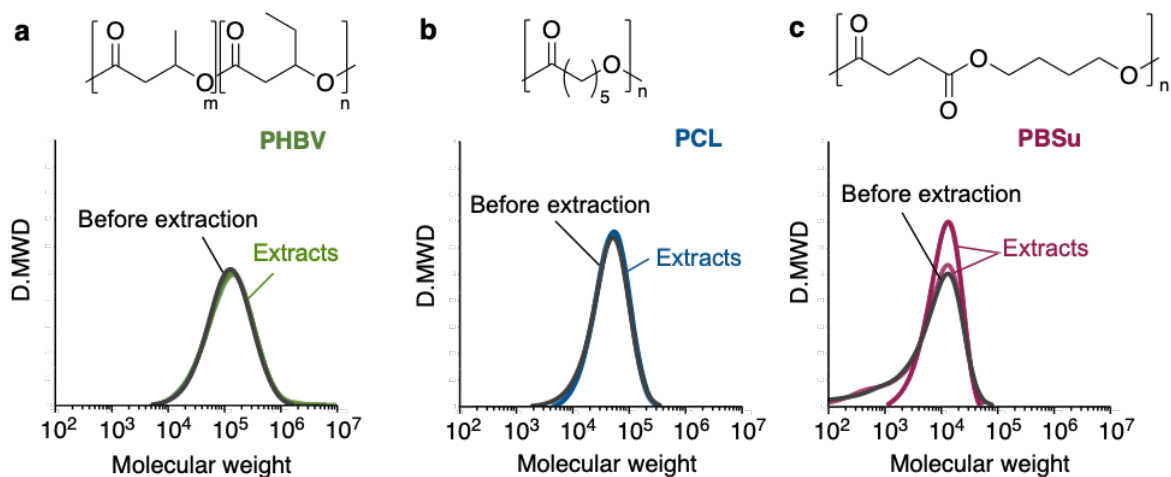

Figure S1. The SEC curves of the original polymer and the extracts from the culture media; **a.** PHBV, **b.** PCL, and **c.** PBSu. D.MWD: differential weight fraction.

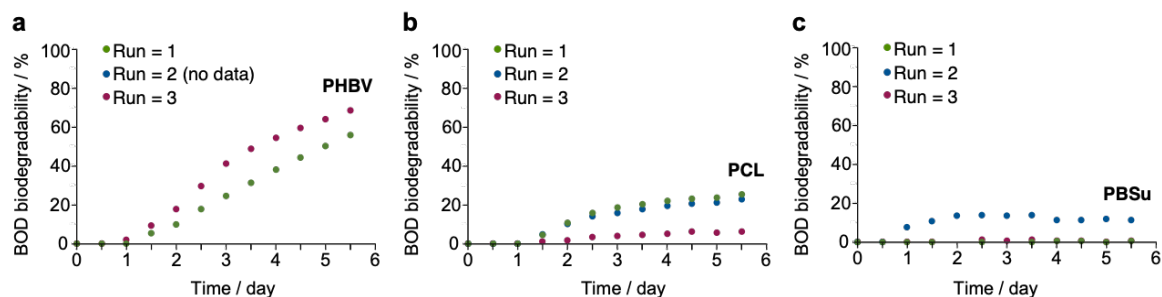

Figure S2. BOD biodegradation curves of **a.** PHBV, **b.** PCL, **c.** PBSu with seawater for 6 days.

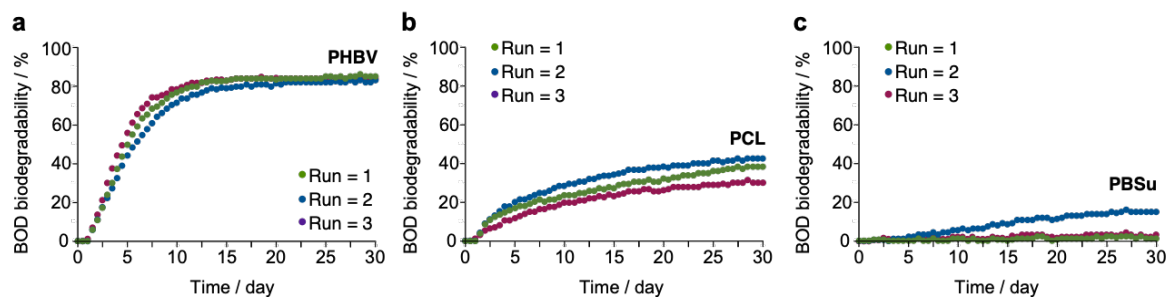

Figure S3. BOD biodegradation curves of **a.** PHBV, **b.** PCL, **c.** PBSu with seawater for 30 days.

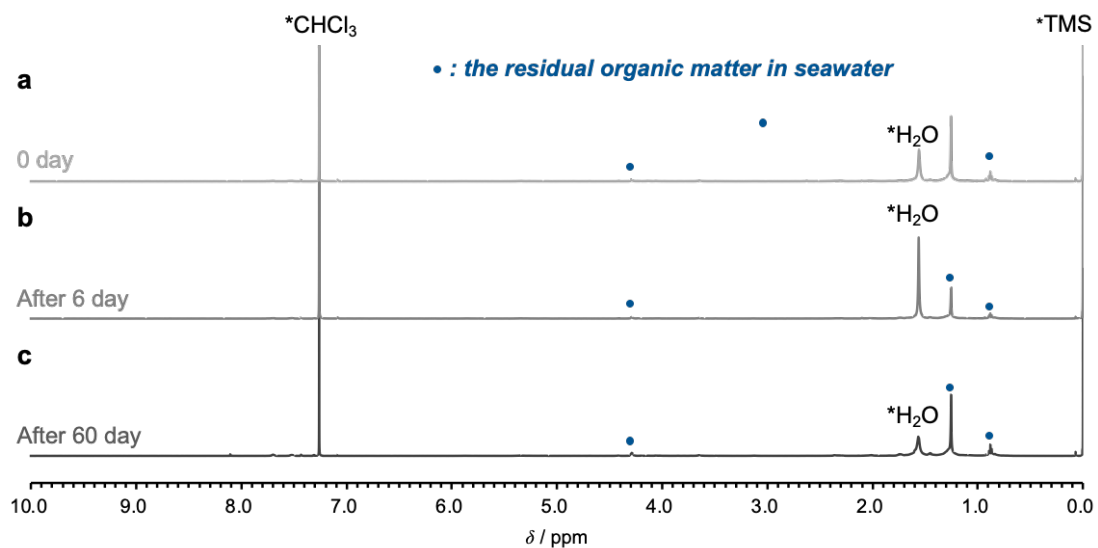

Figure S4.  $^1\text{H}$  NMR spectra (600 MHz,  $\text{CDCl}_3$ , 291 K,  $\delta$ ) of the extracts from the BOD media of the blank solution **a**. before BOD biodegradation testing, after BOD biodegradation testing **b**. after 6 days and **c**. 30 days.

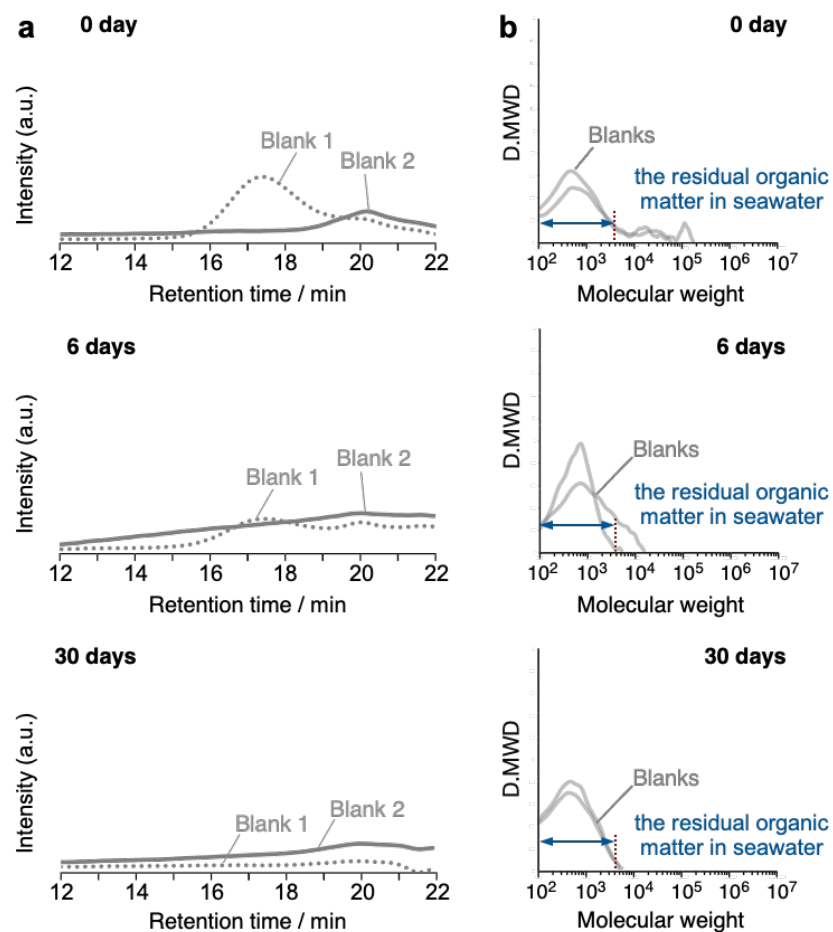

Figure S5. The SEC curves of the extracts from the BOD media after the BOD biodegradation testing:

**a.** retention time vs. intensity, **b.** differential weight fraction vs. molecular weight.

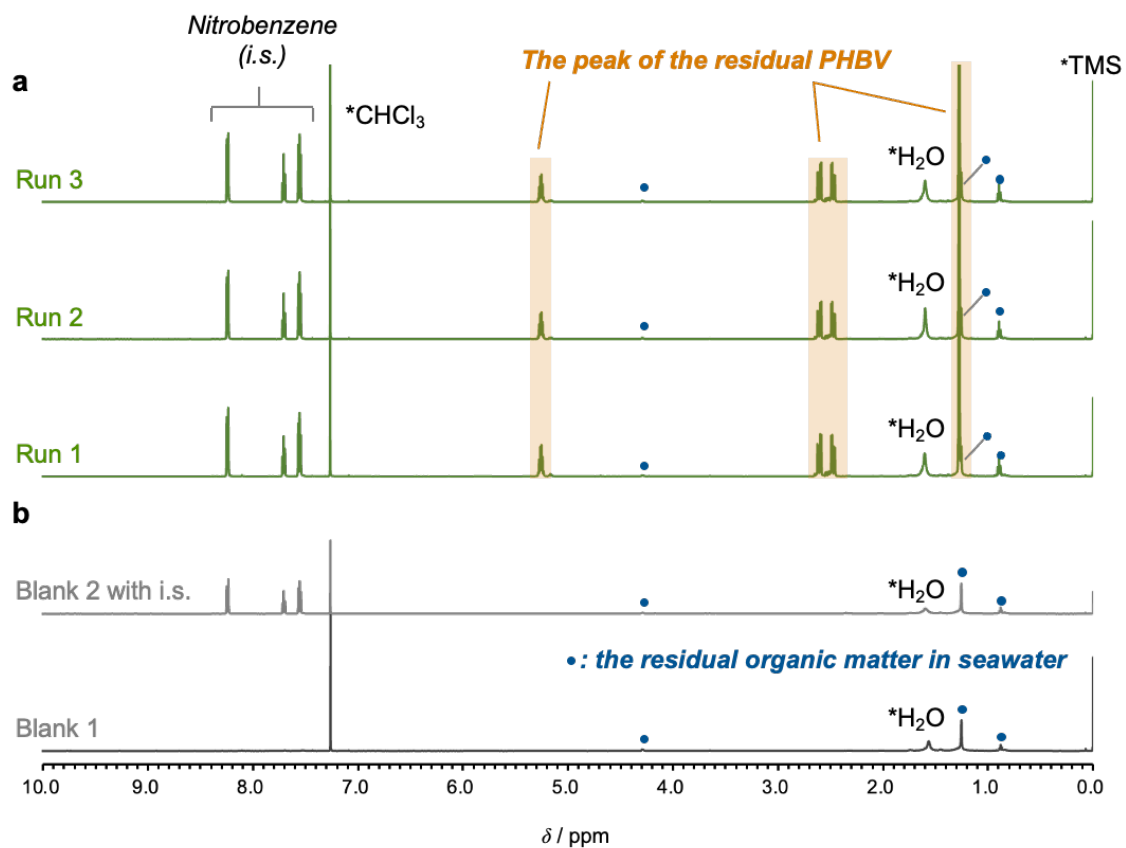

Figure S6.  $^1\text{H}$  NMR spectra (600 MHz,  $\text{CDCl}_3$ , 291 K,  $\delta$ ) of the extracts from the BOD media of **a**. the PHBV and **b**. the blank solutions before BOD biodegradation testing.

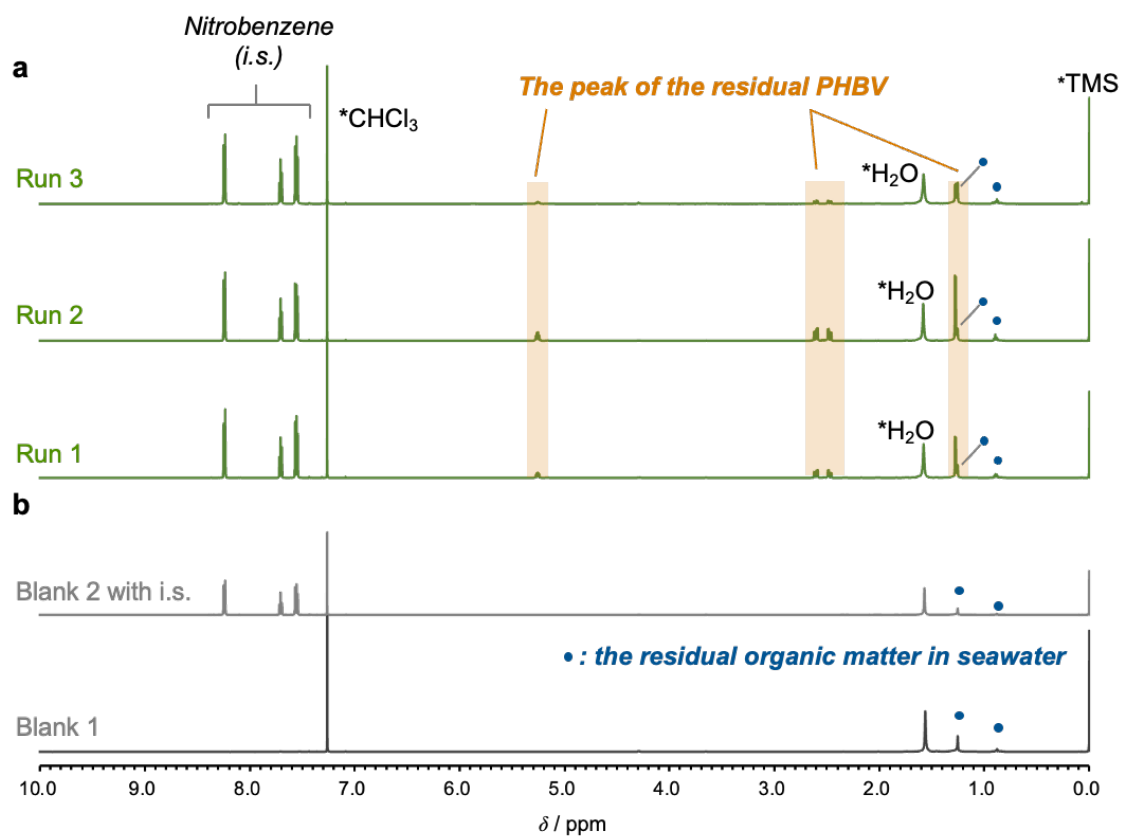

Figure S7.  $^1\text{H}$  NMR spectra (600 MHz,  $\text{CDCl}_3$ , 291 K,  $\delta$ ) of the extracts from the BOD media of **a**. the PHBV and **b**. the blank solutions after BOD biodegradation testing for 6 days.

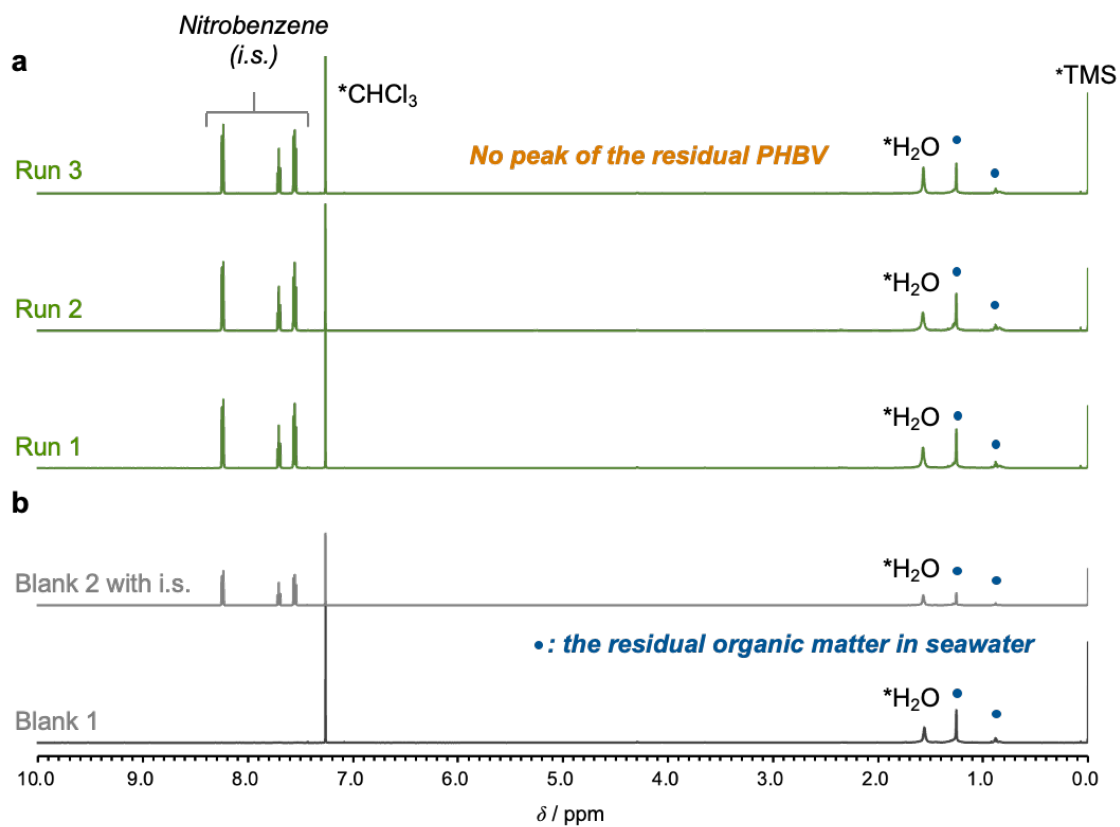

Figure S8.  $^1\text{H}$  NMR spectra (600 MHz,  $\text{CDCl}_3$ , 291 K,  $\delta$ ) of the extracts from the BOD media of **a**. the PHBV and **b**. the blank solutions after BOD biodegradation testing for 30 days.

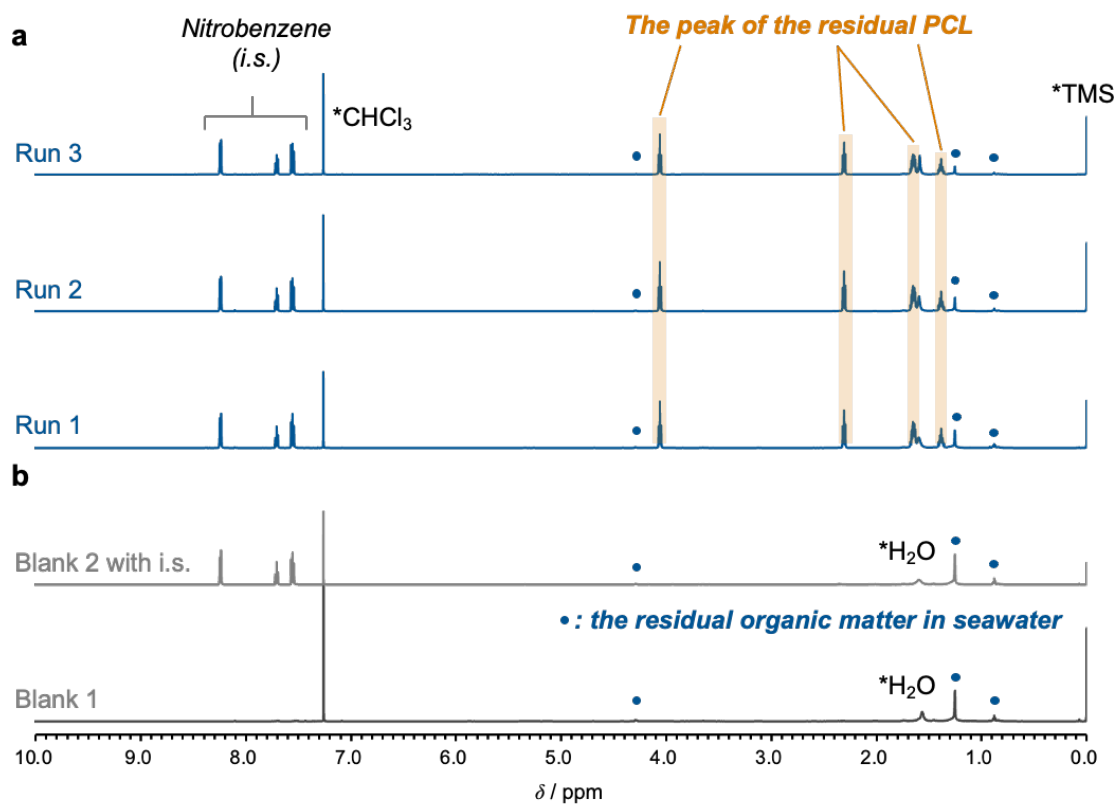

Figure S9. <sup>1</sup>H NMR spectra (600 MHz, CDCl<sub>3</sub>, 291 K,  $\delta$ ) of the extracts from the BOD media of **a**. the PCL and **b**. the blank solutions before BOD biodegradation testing.



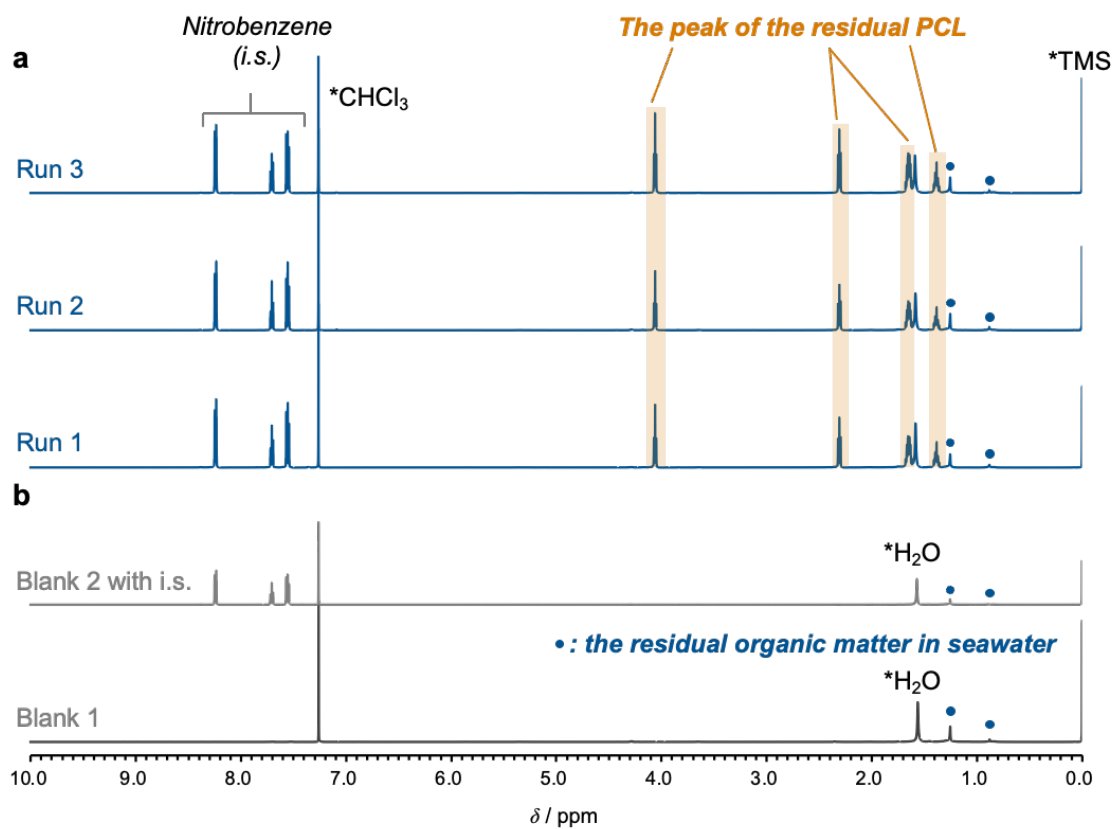

Figure S10. <sup>1</sup>H NMR spectra (600 MHz, CDCl<sub>3</sub>, 291 K,  $\delta$ ) of the extracts from the BOD media of **a**. the PCL and **b**. the blank solutions after BOD biodegradation testing for 6 days.

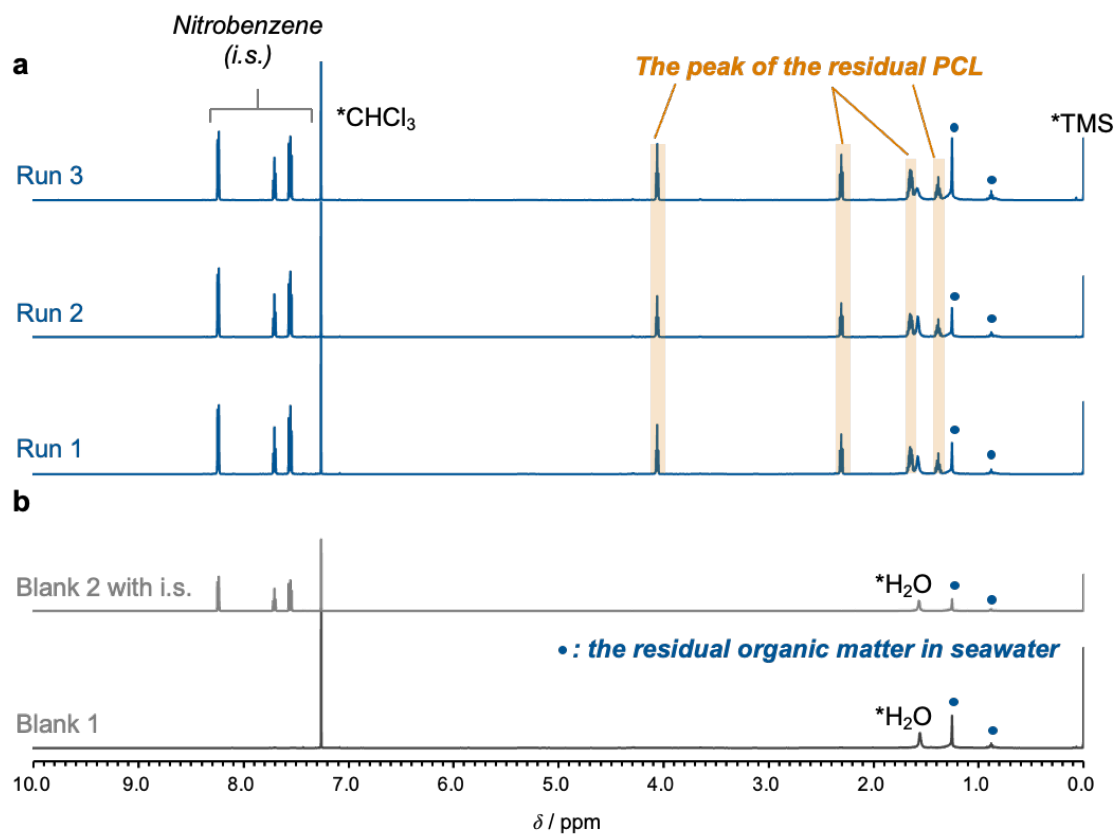

Figure S11. <sup>1</sup>H NMR spectra (600 MHz, CDCl<sub>3</sub>, 291 K,  $\delta$ ) of the extracts from the BOD media of **a**. the PCL and **b**. the blank solutions after BOD biodegradation testing for 30 days.

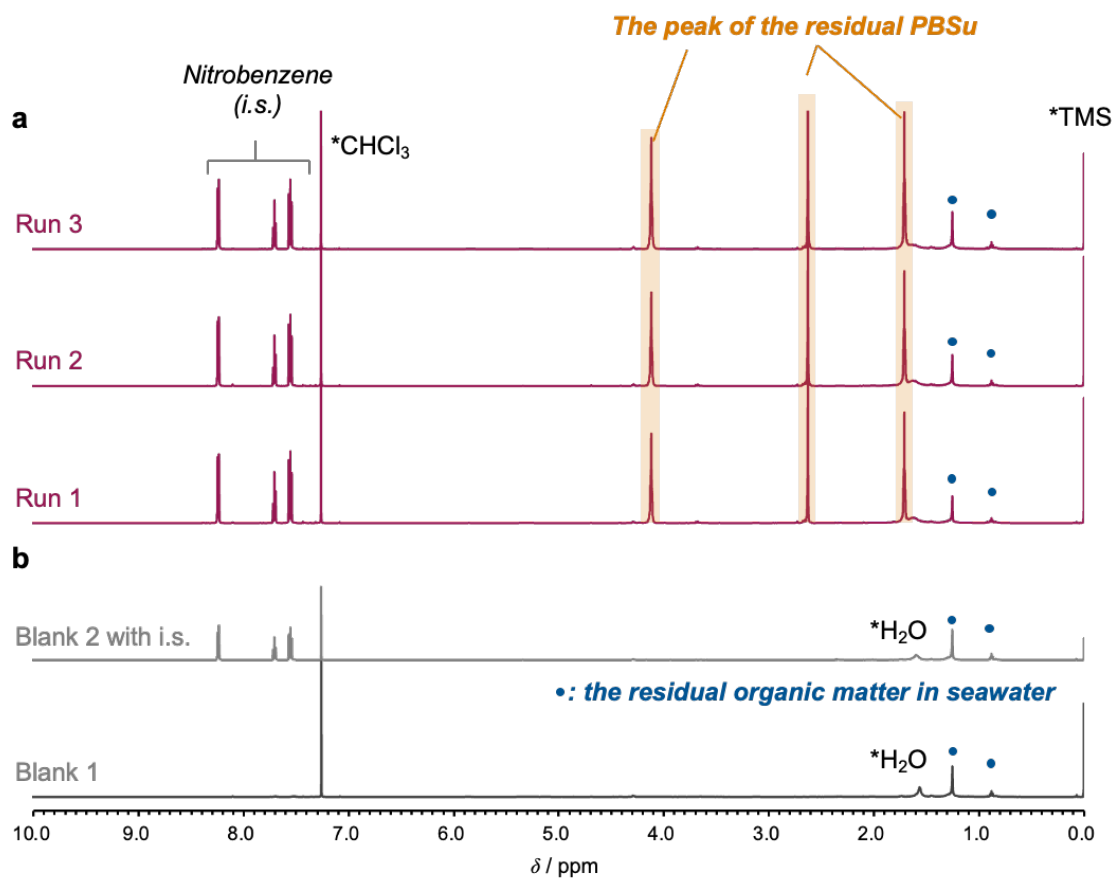

Figure S12. <sup>1</sup>H NMR spectra (600 MHz, CDCl<sub>3</sub>, 291 K,  $\delta$ ) of the extracts from the BOD media of **a.** the PBSu and **b.** the blank solutions before BOD biodegradation testing.

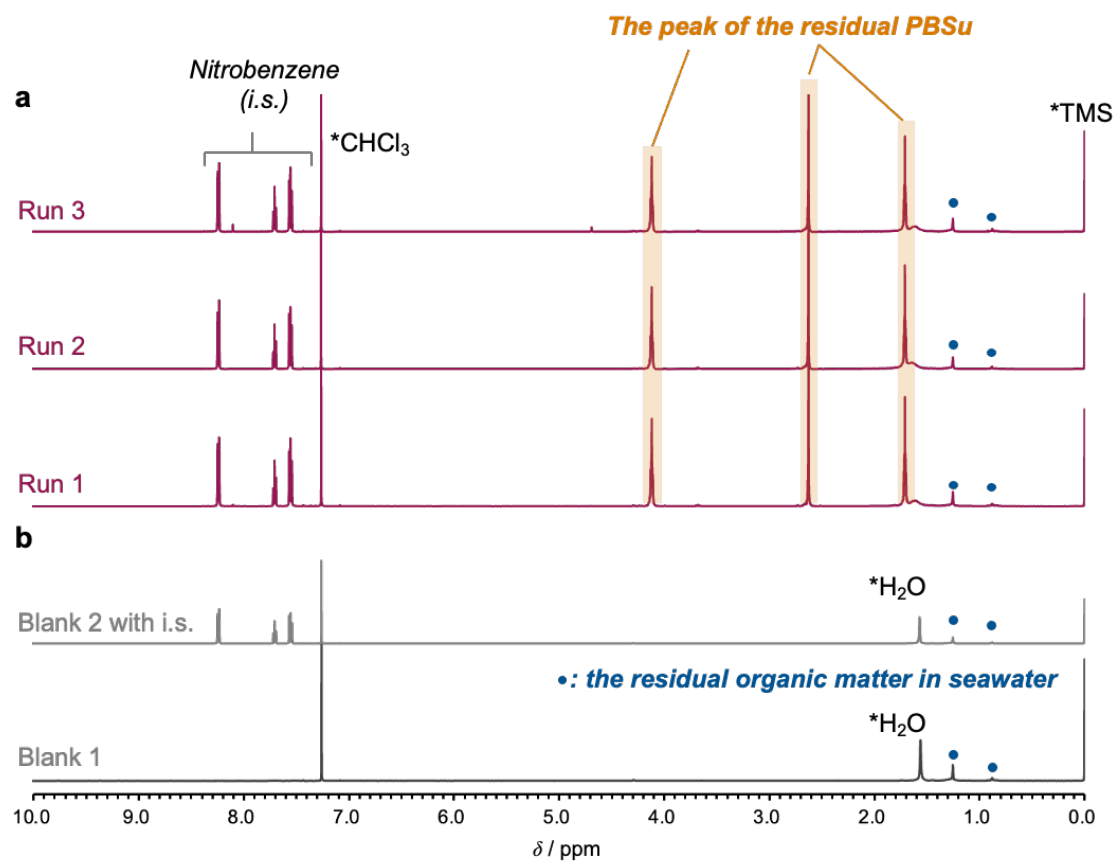

Figure S13. <sup>1</sup>H NMR spectra (600 MHz, CDCl<sub>3</sub>, 291 K,  $\delta$ ) of the extracts from the BOD media of **a**. the PBSu and **b**. the blank solutions after BOD biodegradation testing for 6 days.

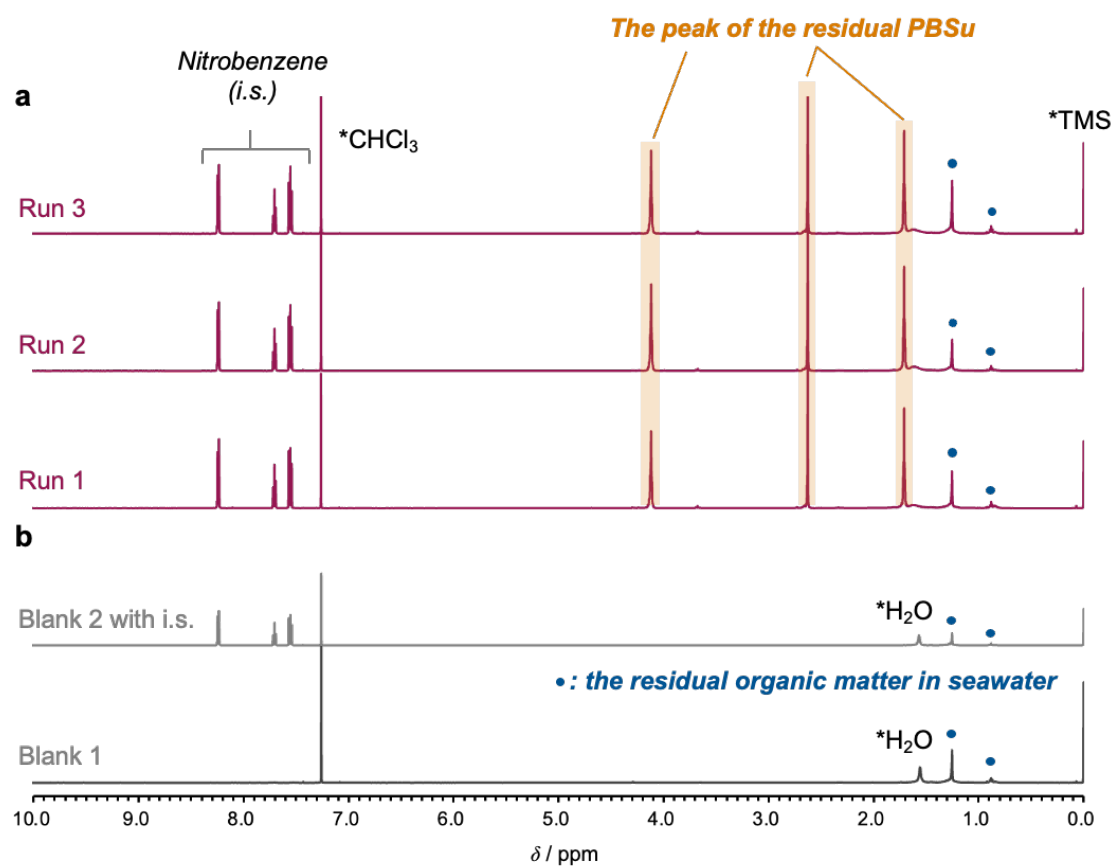

Figure S14. <sup>1</sup>H NMR spectra (600 MHz, CDCl<sub>3</sub>, 291 K,  $\delta$ ) of the extracts from the BOD media of **a**. the PBSu and **b**. the blank solutions after BOD biodegradation testing for 30 days.
